# Supplementary material for: Effects of mindfulness-based psychological care on mood and sleep of leukemia patients in chemotherapy
Source: PubMed Central journal article supplement — Int J Nurs Sci. 2017 Jul 6;4(4):357–61. doi: 10.1016/j.ijnss.2017.07.001 (PMC6626179; doi:10.1016/j.ijnss.2017.07.001), 2017-07-06
Supplement: mmc1.pdf [file mmc1.pdf]

## Manuscript Details

|                          |                                                                                                        |
|--------------------------|--------------------------------------------------------------------------------------------------------|
| <b>Manuscript number</b> | IJNSS_2017_30                                                                                          |
| <b>Title</b>             | Effects of Mindfulness-Based Psychological Care on Mood and Sleep of Leukemia Patients in Chemotherapy |
| <b>Article type</b>      | Research Paper                                                                                         |

### Abstract

**Purpose:** The aim of this research was to explore the benefit of Mindfulness-based psychological care (MBPC) and assess whether the intervention would be beneficial to reducing insomnia and emotional symptoms of patients in leukemia chemotherapy. **Methods:** A randomized, two group, pre-/post-pilot design was applied in the hematology department. Patients in the experimental group received MBPC, and those in the control group received conventional care. Anxiety, depression, and sleeping problems were measured by the Self-Rating Anxiety Scale, and Self-Rating Depression Scale and the Pittsburgh Sleep Quality Index. **Results:** There were significant differences in anxiety, depression, and sleep between the two groups in post-test ( $p < 0.05$ ). A significant decrease in anxiety and depression and an improvement in sleep was observed between the pre- and post-intervention ( $p < 0.05$ ) in the experimental group. **Conclusions:** MBPC significantly improved sleep quality and mood condition of the experimental group. It is an effective complementary therapy for leukemia treatment that is inexpensive, noninvasive, and associated with relaxation and pain reduction.

|                                    |                                                                 |
|------------------------------------|-----------------------------------------------------------------|
| <b>Keywords</b>                    | Mindfulness; Chemotherapy; Psychotherapy; Leukemia; Mood; Sleep |
| <b>Manuscript region of origin</b> | Asia Pacific                                                    |
| <b>Corresponding Author</b>        | Ruixing Zhang                                                   |
| <b>Order of Authors</b>            | Ruixing Zhang, yie yin, yang zhou                               |

## Submission Files Included in this PDF

### File Name [File Type]

cover letter.docx [Cover Letter]

Response to the reviewers.docx [Response to Reviewers (without Author Details)]

Highlights.docx [Highlights]

TITTLE PAGE.docx [Title Page (with Author Details)]

IJNSS\_2017\_30\_R1-manuscript-kgs-edit1CLEAN.docx [Manuscript (without Author Details)]

2017-30-Tables-edited.docx [Table]

IJNSS\_2017\_30\_Chinese abstract.pdf [Supporting File]

To view all the submission files, including those not included in the PDF, click on the manuscript title on your EVISE Homepage, then click 'Download zip file'.

Dear Editor,

On behalf of my co-authors, I am submitting the enclosed material “Effects of Mindfulness-Based Psychological Care on Mood and Sleep of Leukemia Patients in Chemotherapy” for possible publication in your JOURNAL.

We certify that we have participated sufficiently in the work to take public responsibility for the appropriateness of the research design and method, and the collection, analysis, and interpretation of the data.

We have reviewed the final version of the manuscript and approve it for publication. To the best of our knowledge and belief, this manuscript has not been published in whole or in part nor is it being considered for publication elsewhere. The content is about the study of the effect and the results of the mindfulness-based psychological care on Leukemia patients in chemotherapy. We believe the paper may be of particular interest to the readers of your journal.

Correspondence and phone calls about the paper should be directed to Ruixing Zhang at the following address, phone and fax number, and e-mail address:

Best Regards.

Yours Sincerely

Name: Ruixing Zhang

Institute: Nursing college of Zhengzhou University

Address: No. 100 kexue dadao, Zhengzhou, 450052, China

E-mail: 894499618@qq.com

Phone: 8615038004037

## Response to the reviewers

Dear reviewers,

Thank you very much for your significant advice! The article has been revised point to point according the advice of you. The revision detail as following:

The first reviewer:

1. the diagnosis of the participants are introduced in the demographic data
2. conventional care introduction are elaborated.
3. Original Table 1 has been deleted.
4. The demographic characteristics has added in current table 2.
5. English grammar and sentence structure have been revised.

The second reviewer:

1. The decision of sample size is introduced and defined by statistical methods.
2. Inclusion criteria indicate the patients' reading ability, age and conscious state.
3. The discussion has been elaborated.
4. the description of the discussion are revised based on the results.

Thank you!

Best regards!

Authors: Ruixing Zhang; Jie Yin; Yang Zhou

## Highlights

- Leukemia patients suffer physical and mental discomfort in the course of chemotherapy, such as insomnia, anxiety, and fatigue.
- A significant decrease in anxiety and depression and an improvement in sleep was observed between the pre- and post-intervention in the experimental group with the Mindfulness-based psychological care.
- Mindfulness-based psychological care is an effective complementary therapy for leukemia treatment that is inexpensive, noninvasive, and associated with relaxation and pain reduction.

Effects of Mindfulness-Based Psychological Care on Mood and Sleep of Leukemia Patients in  
Chemotherapy

Ruixing Zhang <sup>a</sup>; Jie Yin <sup>b</sup>; Yang Zhou <sup>c</sup>

<sup>a</sup> Nursing College of Zhengzhou University, Zhengzhou, China(Rui-xing Zhang); <sup>b</sup> The 3<sup>rd</sup>  
affiliated hospital of Zhengzhou University, Zhengzhou, China (Jie Yin); <sup>c</sup> The 1<sup>st</sup> affiliated  
hospital of Zhengzhou University Zhengzhou, China (Yang Zhou)

Correspondence: Ruixing Zhang, PhD,RN, Nursing college of Zhengzhou University, Zhengzhou,  
450052, China. ([894499618@qq.com](mailto:894499618@qq.com)).

**Funding**

This study was supported by the basic and updated technology research program of Henan  
Province (25-132102310492) and the new subject research program of nursing college of  
Zhengzhou university (2014HLXK006).

**Acknowledgments**

The authors declare that they have no conflicts of interests. The authors would like to express  
sincere thanks to Yuanqian Jiao for the advice of the program of mindfulness-based intervention.

---

# Effects of Mindfulness-Based Psychological Care on Mood and Sleep Quality of Leukemia Patients in Chemotherapy

## Abstract

**Purpose:** The aim of this research was to explore the benefits of mindfulness-based psychological care (MBPC) and assess whether the intervention would be beneficial in reducing insomnia and emotional symptoms of leukemia patients receiving chemotherapy.

**Methods:** A randomized control design study was applied in two hematology departments in a hospital in Zhengzhou. Patients in the experimental group received mindfulness-based psychological care (MBPC), and those in the control group received conventional care. Anxiety, depression, and sleeping problems were measured using the Self-Rating Anxiety Scale, Self-Rating Depression Scale, and the Pittsburgh Sleep Quality Index.

**Results:** Statistically significant differences were observed among anxiety, depression, and sleeping problems between the two groups in the post-test ( $P < 0.05$ ). A significant decrease in anxiety and depression and an improvement in sleep were observed between pre- and post-interventions ( $P < 0.05$ ) in the experimental group.

**Conclusions:** MBPC significantly improved sleep quality and mood of the experimental group. It

---

is an effective complementary therapy for leukemia treatment that is inexpensive, noninvasive, and associated with relaxation and pain reduction.

Keywords:

Chemotherapy

Leukemia

Mood

Sleep

Mindfulness

## **1. Introduction**

Significant anxious and depressive symptoms are common in the course of leukemia and are related to physical symptom burden. Chemotherapy is a standard treatment for leukemia and benefits most patients. However, patients may experience many different chemotherapy-related side effects, such as discomfort, anxiety, and fatigue, which can significantly affect comfort and well-being during and after cancer treatment [1–4]. Patients receiving chemotherapy described the loss of the ability to touch or be touched by others due to the isolated environment to be the most significant psychological deprivation [5]. Moreover, disturbed sleep is common among cancer patients, and many frequently report daily sleep disturbance following primary treatment [6]. Disturbed sleep may affect mental health and physical functioning [7, 8]. These symptoms can lead to negative influence on the effects of chemotherapy and significantly impact the quality of life of



---

leukemia patients.

Increasing the comfort and well-being of cancer patients during chemotherapy is a goal for all oncology nurses, and emphasis has been placed on the use of complementary interventions to achieve this goal [9]. The use of alternative medicine has grown exponentially since 2000, and an abundance of literature has shown an increase in comfort and well-being when complementary and alternative medicinal therapies are used for cancer patients [10]. Psychological care can increase patients' compliance to chemotherapy [11], and psychological interventions can improve the quality of life of cancer patients [12]. Various psychological interventions deal with the emotional problems of cancer patients. During treatment, patients are required to adhere to strict infection precautions because of their weakened immune systems [13]. This condition must be adequately considered when choosing a psychological intervention method to ensure that it is mild and relaxing. An increasingly popular type of psychological intervention to support people who are living with cancer is mindfulness-based therapy (MBT) [14].

MBT is a mild form of therapy that can reconcile the body and spirit through the mindfulness-based method. Mindfulness is the practice of bringing one's attention to the internal and external experiences occurring in the present moment [15]. It has its roots in Eastern techniques, in particular, Buddhist meditation. Numerous studies have shown that MBT enormously empowers patients with chronic pain [16, 17], hypertension [18, 19], heart disease, and psychological problems, such as depression [20] and anxiety [21, 22], and improves the well-being of cancer patients [23, 24]. Mindfulness-based psychological intervention has been used for many types of problems and had positive results. To the best of our knowledge, the effect of MBT on leukemia patients has seldom been studied. The aim of this study was to assess whether mindfulness-

---

based psychological care (MBPC) improved the health outcomes of Chinese leukemia patients. The research questions were as follows: (1) How can MBPC be applied to leukemia patients? (2) Will the intervention improve mood and sleep? (3) How would patients value this kind of therapy? The original research hypothesis was that variable differences would be observed between pre- and post-intervention results for patients who received MBPC. Moreover, we hypothesized that the experimental and control groups would have differences in the post-test.

## **2. Methods**

### **2.1 Research design and participants**

This is an experimental, randomly assigned study using two groups. Participants were recruited from two hematology departments in the First Affiliated Hospital of Zhengzhou University. All patients who met the inclusion criteria and gave their consent to take part in the study were assigned to the experimental or control group via digital randomization. Inclusion criteria: (1) diagnosed with leukemia, including acute lymphocytic leukemia (ALL), acute myeloid leukemia (AML), chronic lymphocytic leukemia (CLL), chronic myeloid leukemia (CML), and other kinds of leukemia and were receiving chemotherapy; (2) age > 16 years; (3) conscious and has the ability to speak and read the scales or understand the measurement by listening and giving an answer. Exclusion criteria: do not know the diagnosis of their illness, unconscious, and had prior experience with MBT-type practices, such as yoga. The sample size was calculated to be  $\geq 34$  according to the two-sample mean comparison and the statistical calculation, and the coefficients in the calculation are the following:  $\alpha$  is 0.05 and  $1-\beta$  is 0.80; the estimated effect is 0.70. The sample size was decided as 38 in each

---

group thinking over 10% lost.

Thirty-eight patients (20 males and 18 females, mean age  $\pm$  SD:  $38.35 \pm 8.93$  years, range: 17–70 years) were placed in the experimental group, and the same number (19 males and 19 females, mean age  $\pm$  SD:  $39.71 \pm 9.42$  years, range: 18–71 years) was placed in the control group at pre-intervention. At post-intervention, the experimental group consisted of 33 participants and the control group consisted of 32, all of whom received MBPC and successfully completed the measurements.

## **2.2 Interventions**

### 2.2.1. Conventional care

Conventional care involved physical assessment; protective isolation; medication; normal living care including safety, diet, and oral care; other necessary care; and health education on oral hygiene, emotional adjustment, leukemia, and self-protection/self-management. No other planned activities took place during the IV infusion, although some patients chose to read, listen to music, or watch television.

### 2.2.2. MBPC

Besides conventional care, patients received 30–40 min of MBPC during IV infusion that usually lasted at least 1.5 h. To coincide with the chemotherapy condition, MBPC was slightly modified based on the original mindfulness-based stress reduction (MBSR), which was established by Williams [25] and edited into Chinese by Liu [26]. It consists of seven meditation episodes, which would be played by an audio player or cell phone. MBSR is a structured group program that employs mindfulness meditation to alleviate suffering associated

---

with physical, psychosomatic, and psychiatric disorders [14]. The manualized MBPC program in this study features five weeks of therapeutic sessions. The content and operation schedule are presented in Table 2. On the first week, caregivers guided the participants individually. After which, the participants engaged in mindfulness-based practice independently, and caregivers provided needed counseling and help. Caregivers initially provided the participants with explanations and directions on the therapy. After which, they slowly moved on to a purely encouraging role but still communicated with patients about their feelings after the practice. The participants were invited to focus with an interested, accepting, and non-judgmental attitude on their difficult sensations, emotions, cognitions, and behavior. They were guided by verbal cues with background music to focus their attention on movement, breathing, and feelings throughout the exercises (Table 1). Although walking and sitting forms of meditations are common tools for the mindfulness-based approach, lying dominated in this setting due to the chemotherapy. Eventually, the patients were encouraged to practice mindfulness in their daily lives. This continued the therapeutic process outside of the confines of the therapeutic sessions and allowed the patients to observe, explore, and experience mindfulness at other times. The caregivers and patients evaluated the effects and obstacles they encountered during daily life and used these as a catalysts for thought modification.

\*\*\* Insert Table 1 about here \*\*\*

## **2.3 Measurements**

---

A short demographic survey was used to determine the patients' age, gender, occupation, ethnicity, and satisfaction with the intervention. Patients were told that provision of this data was optional. Information about the disease, such as leukemia subtype and chemotherapy session, was filled out by the caregivers.

The second measurement was the Chinese version of the Pittsburgh Sleep Quality Index (PSQI). The PSQI is a self-administered questionnaire that measures the aspects of sleep quality. It is a standard instrument for measuring subjective insomnia with seven dimensions: subjective sleep quality, time of falling asleep, sleep time, sleep efficiency, sleep disorders, use of hypnotic drugs, and daytime dysfunction. A score of  $\geq 6$  is considered to be pathological [27]. A high score meant serious insomnia. The alpha reliability coefficient was 0.803 in this study.

The third measurement is the Self-Rating Anxiety Scale (SAS). It was designed by Zung [28] to quantify patients' levels of anxiety. The SAS is a 20-item self-report assessment device based on scoring in four groups of manifestations: cognitive, autonomic, motor, and central nervous system symptoms. Some questions are negatively worded to avoid the problem of set response. Overall assessment was based on the total score. The total raw scores range from 20–80. The raw score was then converted to a percentage standard score. The alpha reliability coefficient of SAS was 0.915 in this study.

The Self-Rating Depression Scale (SDS), also designed by Zung [29], assesses patients' level of depression. The alpha reliability coefficient was 0.927 in this study. This scale is a short self-administered survey to quantify the depressed status of a patient and has the same score calculation as the SAS.

#### *2.4 Data collection and analysis*

---

Two of the authors (RNs as well as psychotherapists) were located on the inpatient ward and personally approached each patient about the study. If the person wished to participate, informed consent was obtained during the research period, and the patient was assigned to the experimental or control group by digital randomization. The measurements were performed in a quiet setting and carried out following the standard testing procedures. The data collectors gave each participant all the instruments at the beginning and the end of the research.

Patients in conventional care (control group) were treated as they normally would be when receiving chemotherapy. They were asked by the researchers to fill out the instruments for 30 minutes after the IV infusion for the baseline assessment and asked to do the same measurement five weeks later. Patients in the MBPC group (experimental group) were asked to fill out the instruments for the baseline assessment in the same setting as the control group. They then received the MBPC in addition to the conventional care for five weeks. After a five-week inpatient MBPC, the researchers provided post-test measurements in the same settings for both groups.

Data were analyzed using SPSS 19.0, and descriptive statistics were calculated for all study variables. The differences between the pre- and post-test scores were normally distributed, and t-tests were used to evaluate the changes in PSQI, SAS, and SDS from pre- to post-test. The contrasts between the conventional care and MBPC groups were examined. The distribution of the demographic category variables for the two groups was analyzed using chi-square tests. The level of significance was set at 0.05.

#### **2.4. Ethics and protection of participants**

---

The study was approved by the Regional Ethics Board in Zhengzhou University. All participants were informed about the research purpose and voluntarily took part in and completed the measurement. They were assured that their answers would be kept confidential. To ensure confidentiality, the consent form, demographic survey, and instruments were individually coded. At the end of each day, the consent forms were separated from the data and filed, ensuring no patient names appeared on the responses. Data were stored in a specially allocated confidential location.

Human subject protection was ensured. All members of the research team were RNs or psychologists, and the conventional care providers were experienced and certified oncology nurses. Data collection and treatment did not begin until vital signs were stable and the patients were comfortable. In any occasion where patients became ill or uncomfortable, the nurses will identify the problem and provide assistance. Researchers asked each participant if they suffered any discomfort while receiving the intervention and gave them help when needed. Caregivers provided timely counseling during the whole research period.

### **3. Results**

#### **3.1. Demographics and diagnosis**

At post-intervention, the experimental group consisted of 33 participants, and the control group consisted of 32 participants. No significant difference was observed between the two groups in age, gender, and suffering time. A total of 8 ALLs, 7 AMLs, 5 CLLs, 7 CMLs, and 6 other kinds of leukemia were noted in the experimental group. In the control group, 7 ALLs, 7 AMLs, 6 CLLs, 7 CMLs, and 5 other kinds of leukemia were noted.

---

\*\*\* Insert Table 2 about here \*\*\*

### **3.2. Differences in sleep quality, anxiety, and depression**

Using the PSQI, SAS, and SDS, no significant difference was observed between the baseline measurements of the two groups. No statistical differences were noted for insomnia, anxiety, or depression results related to the demographics ( $P > 0.05$ ). The experimental group did show improvements in insomnia, depression, and anxiety ( $P < 0.05$ ) from pre- to post- intervention, whereas the control group did not ( $P > 0.05$ ). Significant differences were noted between the experimental and control groups after the treatment ( $P < 0.05$ ) (see [Table 3](#)). Overall, the results supported the hypothesis that MBPC can significantly improve sleep quality and mood of leukemia patients in chemotherapy.

\*\*\* **Insert Table 3 about here** \*\*\*

### **3.3. Satisfaction of MBPC recipients**

The intervention was acceptable for all the participants in terms of time commitments in the experimental group. No participant reported side effects or discomfort. Patients in the experimental group expressed high satisfaction (90.9%) with the intervention. All recipients desired to devote themselves to the practice after the intervention was finished, although no guidance was provided after the intervention was completed.

## **4. Discussion**

### **4.1. MBPC improves the mood and sleep quality of leukemia patients**



---

This research showed that patients' anxiety had been significantly relieved after MBPC. Anxiety is the subjective unpleasant feeling of dread over anticipated events, such as the feeling of imminent death. Leukemia is a life-threatening form of cancer associated with substantial morbidity and mortality. It is associated with a great deal of uncertainty. Therefore, patients always worry about the treatment effects. Mindfulness involves paying attention to the event experienced in the present moment with a non-judgmental attitude. This kind of attitude helps patients observe the present situation but not predicate if it is good/bad or right/wrong. The mindfulness-based practice deals specifically with the internal conflicts of patients and helps them cope with stress and develop true calmness, in order to relieve anxiety.

Additionally, depression in leukemia patients was significantly decreased in this study. Patients with acute leukemia were more likely to report intense worrying or sadness [30]. When receiving chemotherapy, they may feel notably hopeless, helpless, dejected, or worthless. The depressive mood always influences the physical state of these patients. This depressed mood comes from the fear of the life-threatening disease itself and the contradiction that is created in the mind. MBT is a clinical application of principles found in Buddhism and other spiritual practices. It involves the key elements of non-judgmental acceptance of physical pain or psychological distress, thereby reducing the tendency to ruminate over and catastrophize these experiences [31]. Moreover, it has been proven to benefit mental health [32]. The mindfulness-based practice advocates acceptance without judgment. It can, thus, help patients cope with sadness and relieve depression.

In the experimental group, sleep quality was better than that of the control group after the intervention. Sleep quality was obviously impacted by mood. The release of anxiety and depression can benefit sleep; therefore, patients who received the intervention had significantly improved sleep quality.

---

In this study, MBPC improved the mood and sleep quality of patients in chemotherapy in hospital wards. Evidently, mood and sleep quality significantly influence patients' well-being and quality of life. Therefore, this intervention can improve the psychophysical conditions of leukemia patients in chemotherapy and would benefit their overall treatment.

#### **4.2. Implications for practice**

MBPC is a mild and effective intervention that benefits leukemia patients receiving chemotherapy. It can be carried out in a nursing environment. From interviews with the participants, a high level of satisfaction with the intervention, from the style to the content, was attained. It is a type of intervention that is easily acceptable by leukemia patients. It also can be conveniently applied in a nursing environment. It is easy to learn, inexpensive, noninvasive, and associated with relaxation and stress reduction. Moreover, it can be practiced in lying or sitting positions or through walking, which increased participants' compliance to this intervention.

#### **4.3. Limitations and research prospect**

This study was conducted in one medical center with a homogeneous group of patients. Whether additional sites and a more heterogeneous population will produce different results needs further experimentation. Overall, the need for additional research in the care of leukemia patients related to mindfulness is evident. We hope that the intervention can provide long-lasting effects on patients' lives and that they will continuously apply the intervention after the study. That is, we anticipated that the patients would form a suitable lifestyle and thinking style, but we have not tested this theory. The long-term effects of the therapy should, therefore, be considered as a subject for future research.

#### **Funding**

This study was supported by the "Basic and Frontier Technology Research Program" of Henan Province

---

(25-132102310492) and the new subject research program of the Nursing College of Zhengzhou University (2014HLXK006).

### **Conflicts of interests**

The authors declare that they have no competing interests.

### **References**

- [1] Gheihman G, Zimmermann C, Deckert A, et al. Depression and hopelessness in patients with acute leukemia: the psychological impact of an acute and life-threatening disorder. *Psycho-Onco.* 2016; 25(8): 979-89.
- [2] Mackenzie MJ, Carlson LE, Munoz M, et al. A qualitative study of self-perceived effects of mindfulness-based stress reduction (MBSR) in a psychosocial oncology setting. *Stress Health.* 2007; 23(1):59–69.
- [3] Kayl A E, Meyers CA. Side-effects of chemotherapy and quality of life in ovarian and breast cancer patients. *Curr Opin Obstet Gyn.* 2006; 18(1):24-28.
- [4] Redeker NS, Lev EL, Ruggiero J. Insomnia, fatigue, anxiety, depression, and quality of life of cancer patients undergoing chemotherapy. *Scholarly Inquiry for Nursing Practice.* 2000; 14(4):275-290; Discussion 291-8.
- [5] Yates JW, Holland JF. A controlled study of isolation and endogenous microbial suppression in acute myelocytic leukemia patients. *Cancer.* 1973; 32(6):1490-1498.
- [6] Howell D, Oliver TK, Kellerolaman S, et al. Sleep disturbance in adults with cancer: a systematic review of evidence for best practices in assessment and management for clinical practice. *Annals of Oncology,* 2014; 25(4):791-800.
- [7] Cho M, Dodd M. Prevalent symptoms in sleep-disturbed versus non sleep-disturbed breast cancer patients

---

during and 4 to 6 months after cancer treatments. *Oncol Nurs Forum*. 2009;36(3):64.

- [8] Ray M, Rogers LQ, Trammell R A, et al. Fatigue and sleep during cancer and chemotherapy: translational rodent models. *Comparative Med* . 2008; 58(3):234-45.
- [9] Catlin A, Rebecca L, Taylor-Ford R L. Investigation of standard care versus sham reiki placebo versus actual reiki therapy to enhance comfort and well-being in a chemotherapy infusion center. *Oncol Nurs Forum*. 2011;38(3): E213-E220.
- [10] Byrne M. Cancer chemotherapy and quality of life: cancer trials should include measures of patients' wellbeing. *Bmj*. 1992; 304(6841): 18-23.
- [11] Zhou L, Han CP, Zhang CQ. The influence of psychological intervention with leukemia sufferers' psychological status and chemotherapy compliance. *Chinese Journal of Behavioral Medical Science*, 2003.
- [12] Lee GA, Li Q, Zheng YJ. The effect of the clinical psychological intervention on the life quality of the leukemia patients. *Psychological Science(Chinese)*. 2005;28(2):436- 437.
- [13] Mosher CE, Redd WH, Rini C M, et al. Physical, psychological, and social sequelae following hematopoietic stem cell transplantation: a review of the literature. *Psycho-Oncol*. 2009; 18(2):113-27.
- [14] Zhang J, Rui X, Bo W, et al. Effects of mindfulness-based therapy for patients with breast cancer: A systematic review and meta-analysis. *Complement Ther Med*. 2016;26:1-10.
- [15] Kabat-Zinn J. *Wherever you go, there you are: Mindfulness meditation in everyday life*. New York, NY: Hyperion; 1994
- [16] Cathcart S, Galatis N, Immink M, et al. Brief mindfulness-based therapy for chronic tension-type headache: a randomized controlled pilot study. *Behav Cogn Psychoth*. 2013; 42(1):1-15.
- [17] De Boer MJ, Steinhagen HE, Versteegen G J, et al. Mindfulness, acceptance and catastrophizing in chronic pain. *Plos One*. 2014; 9(1):e87445.

- 
- [18] Palta P, Page G, Piferi RL, et al. Evaluation of a Mindfulness-Based Intervention Program to Decrease Blood Pressure in Low-Income African-American Older Adults. *J Urban Health*. 2012; 89(2):308-316.
- [19] Blom K, Baker B, How M, et al. Hypertension analysis of stress reduction using mindfulness meditation and yoga: results from the harmony randomized controlled trial. *Am J Hypertens*. 2014; 27(1):122-129.
- [20] Geschwind N, Peeters F, Drukker M, et al. Mindfulness training increases momentary positive emotions and reward experience in adults vulnerable to depression: a randomized controlled trial. *J Consult Clin Psychol*. 2011;79(5):618-28.
- [21] Hofmann SG, Sawyer AT, Witt AA, et al. The effect of mindfulness-based therapy on anxiety and depression: A meta-analytic review. *J Consult Clin Psychol*. 2010; 78(2):169-183.
- [22] Anderson ND, Lau MA, Segal ZV, et al. Mindfulness-based stress reduction and attentional control. *Clin Psychol Psychot*. 2007; 14(6):449–463.
- [23] Bränström R, Kvillemo P, Brandberg Y, et al. Self-report Mindfulness as a Mediator of Psychological Well-being in a Stress Reduction Intervention for Cancer Patients—A Randomized Study. *Ann Behav Med*. 2010; 39(2):151-161.
- [24] Collard P, Boniwell NAI. Teaching Mindfulness Based Cognitive Therapy (MBCT) to students: The effects of MBCT on the levels of Mindfulness and Subjective Well-Being. *Counseling Psychology Quarterly*. 2009; 21(21):323-336.
- [25] Williams M, Penman D. (2011).*Mindfulness: A Practical Guide to Finding Peace in a Frantic World*. London: Piatkus.
- [26] Williams M, Penman D, Liu HQ (translator).*Mindfulness: A practical guide to finding peace in a frantic world (Chinese version)*. Beijing. BJ: Jiuzhou express; 2013.
- [27] Morin CM, Stone J, Trinkle D. Dysfunctional beliefs and attitudes about sleep among older adults with and without insomnia complaints. *Psychol Aging*. 1993; 8(8):463-467.

- 
- [28] Zung WW. A rating instrument for anxiety disorders. *Psychosomatics*. 1971; 12(6):371-9.
- [29] Zung WW. The measurement of affects: depression and anxiety. *Modern Problems of Pharmacopsychiatry*. 1974; 7(7):170-88.
- [30] Zimmermann C, Yuen D, Mischitelle A, et al. Symptom burden and supportive care in patients with acute leukemia. *Leukemia Res*. 2013; 37(7):731-736.
- [31] Keng SL, Smoski MJ, Robins C J. Effects of mindfulness on psychological health: A review of empirical studies. *Clin Psychol Review*. 2011; 31(6):1041-1056.
- [32] Coffey KA, Hartman M, Fredrickson B L. Deconstructing Mindfulness and Constructing Mental Health: Understanding Mindfulness and its Mechanisms of Action. *Mindfulness*. 2010; 1(4):235-253.

**Table 1. Implementing Schedule of MBPC**

| <b>Sequence</b> | <b>Mindfulness-based Activity</b>                                                                   | <b>Work of the Caregivers</b>                                                                                                                                                                                                                                                  |
|-----------------|-----------------------------------------------------------------------------------------------------|--------------------------------------------------------------------------------------------------------------------------------------------------------------------------------------------------------------------------------------------------------------------------------|
|                 | (Following the sound of the audio player)                                                           |                                                                                                                                                                                                                                                                                |
| Session 1       | Meditation 1: Mindfulness of body and Breath (8 min)<br><br>Meditation 2: Body Scan (length 15 min) | 1. Explain the mindfulness and practical principles<br><br>2. Try to listen to the audio player with the participants for 8 min<br><br>3. Instruct the participants to experience the feeling of air passing in and out of their body<br><br>4. Encourage patients' expression |
| Session 2       | Meditation 3: Mindful movement (9 min)<br><br>Meditation 4: Breath and body (8 min)                 | 1. Encourage patients' expression<br><br>2. Guide the patients' experience of mindfulness in bed                                                                                                                                                                               |
| Session 3       | Meditation 5: Sounds and thoughts (8 min)<br><br>Meditation 6: Exploring difficulty (10 min)        | 1. Encourage expression<br><br>2. Instruct the participants to experience mindfulness in drinking and eating                                                                                                                                                                   |
| Session 4       | Meditation 7: Befriending (10 min)<br><br>Meditation 8: Three-minute breathing space (3 min)        | 1. Direct the participants to experience mindfulness in life<br><br>2. Encourage expression                                                                                                                                                                                    |

---

|           |                                                                       |                                                                                             |
|-----------|-----------------------------------------------------------------------|---------------------------------------------------------------------------------------------|
| Session 5 | Repeating two of the above seven mediations<br>(approximately 30 min) | 1. Direct the participants to experience mindfulness in life<br><br>2. Encourage expression |
|           | Experiencing mindfulness in life                                      |                                                                                             |

---

Instruction: Each session is performed once a day for 1 week with three repetitions for each practice.

**Table 2. Demographic characteristics of the Participants**

| Demographic Variable                   | Experimental group<br>( <i>n</i> =33) | Control group<br>( <i>n</i> =32) | <i>t</i> / $\chi^2$ | <i>P</i> |
|----------------------------------------|---------------------------------------|----------------------------------|---------------------|----------|
| Gender                                 |                                       |                                  |                     |          |
| Male                                   | 19                                    | 17                               | 0.13                | 0.72     |
| Female                                 | 14                                    | 15                               |                     |          |
| Age (years)                            | 35.64 ± 15.60                         | 33.58 ± 14.75                    | 0.49                | 0.63     |
| Time of Leukemia suffering<br>(months) | 9.28±11.30                            | 9.87±10. 54                      | 0.19                | 0.85     |

---



**Table 3. Differences in Pre- and Post-Test Scores of the Two Groups**

| Variable | Experimental group ( <i>n</i> =33) |             | Control group ( <i>n</i> =32) |            | <i>P</i> | <i>P</i> | <i>P</i> | <i>P</i> |
|----------|------------------------------------|-------------|-------------------------------|------------|----------|----------|----------|----------|
|          | ①Pre-test                          | ②Post-test  | ③Pre-test                     | ④Post-test | ①vs②     | ③vs④     | ①vs③     | ②vs④     |
| PSQI     | 10.04±3.14                         | 6.31±4.08   | 9.73±3.11                     | 10.31±4.76 | 0.002    | 0.321    | 0.523    | 0.001    |
| SAS      | 56.83±7.79                         | 40.91±10.03 | 56.91±8.11                    | 59.74±9.35 | <0.001   | 0.406    | 0.479    | <0.001   |
| SDS      | 63.35±8.61                         | 46.87±7.48  | 61.87±8.95                    | 58.93±7.43 | <0.001   | 0.295    | 0.399    | <0.001   |

# 基于正念的心理护理对化疗期白血病患者情绪与睡眠的影响

张瑞星, 尹洁, 周杨

## 【摘要】

**目的** 评估基于正念的心理护理对化疗期间白血病患者睡眠与情绪的影响。

**方法** 在郑州一所医院的血液病治疗中心实施一项随机对照试验。实验组患者在化疗过程中接受基于正念的心理护理, 对照组仅接受传统的护理措施。分别用焦虑自评量表、抑郁自评量表和匹茨堡睡眠指数量表测量患者的焦虑、抑郁与睡眠质量。

**结果** 干预后实验组焦虑、抑郁与失眠程度低于对照组, 差异有统计学意义( $P < 0.05$ )。与干预前比较, 实验组患者的焦虑、抑郁与失眠在干预后有改善, 差异有统计学意义( $P < 0.05$ )。

**结论** 基于正念的心理护理能够显著改善患者在化疗期间的睡眠质量和情绪状态。此方法花费较低、非侵入性, 且有助于患者放松和减轻痛苦。

**【关键词】** 化疗; 白血病; 情绪; 睡眠; 正念

通信作者: 张瑞星, E-mail: 894499618@qq.com
